# Supplementary material
Source: PubMed Central journal article supplement (PMC3125856)
Supplement: supp_79_6_2372__1.pdf [file supp_79_6_2372__1.pdf]

**Supplemental Table 1.** Pulmonary gene induction in A/J mice three weeks after mycobacterial infection.

| Gene            | BCG Russia            | BCG Pasteur           | <i>M. tuberculosis</i> | Adjusted p-value          |
|-----------------|-----------------------|-----------------------|------------------------|---------------------------|
| <i>Ccl1</i>     | -3.19 (-7.27, -1.40)  | 1.01 (-2.38, 2.40)    | 3.63 (1.54, 8.55)      | <b>0.013</b> <sup>a</sup> |
| <i>Ccl11</i>    | -1.48 (-2.34, 1.08)   | -1.35 (-2.01, 1.10)   | -1.58 (-3.27, 1.31)    | - <sup>b</sup>            |
| <i>Ccl12</i>    | -4.40 (-6.24, -3.10)  | -1.55 (-4.02, 1.67)   | 4.95 (3.86, 6.36)      | <b>0.006</b>              |
| <i>Ccl17</i>    | -1.21 (-1.66, 1.14)   | -1.04 (-1.37, 1.26)   | 1.53 (1.01, 2.30)      | -                         |
| <i>Ccl19</i>    | -1.58 (-2.20, -1.13)  | 1.14 (-1.22, 1.57)    | 1.61 (1.11, 2.35)      | 0.007 <sup>c</sup>        |
| <i>Ccl2</i>     | 1.68 (-1.17, 3.30)    | 2.09 (-1.35, 5.90)    | 6.48 (4.08, 10.30)     | <b>0.033</b>              |
| <i>Ccl20</i>    | 1.95 (-1.04, 3.97)    | 3.25 (1.67, 6.35)     | 5.65 (2.58, 12.38)     | <b>0.037</b>              |
| <i>Ccl4</i>     | -1.57 (-1.81, -1.35)  | 1.50 (-1.47, 3.30)    | 4.63 (3.69, 5.80)      | <b>0.006</b>              |
| <i>Ccl5</i>     | -1.83 (-2.61, -1.28)  | 1.53 (-1.20, 2.82)    | 4.89 (3.34, 7.16)      | <b>0.006</b>              |
| <i>Ccl7</i>     | -1.35 (-1.80, -1.01)  | 1.33 (-2.25, 4.00)    | 9.80 (4.78, 20.11)     | <b>0.020</b>              |
| <i>Ccl8</i>     | -1.78 (-3.21, 1.01)   | -1.02 (-2.49, 2.41)   | 6.89 (3.60, 13.19)     | <b>0.009</b>              |
| <i>Ccl9</i>     | -2.38 (-6.90, 1.22)   | -1.70 (-3.78, 1.31)   | 1.20 (-1.10, 1.59)     | -                         |
| <i>Ccr1</i>     | -1.10 (-1.78, 1.47)   | 1.01 (-1.86, 1.90)    | 1.73 (1.33, 2.26)      | 0.029                     |
| <i>Ccr2</i>     | -1.17 (-2.02, 1.47)   | -1.50 (-3.50, 1.56)   | 1.32 (-1.60, 2.77)     | -                         |
| <i>Ccr4</i>     | -1.12 (-1.77, 1.40)   | -1.66 (-2.85, 1.03)   | -1.20 (-1.59, 1.10)    | -                         |
| <i>Ccr5</i>     | -1.29 (-1.88, 1.13)   | 1.08 (-1.65, 1.92)    | 3.19 (2.23, 4.57)      | <b>0.020</b>              |
| <i>Ccr7</i>     | -1.76 (-2.44, -1.27)  | -1.85 (-2.61, -1.31)  | -1.78 (-2.86, -1.11)   | -                         |
| <i>Ccr9</i>     | -1.10 (-1.38, 1.15)   | -1.33 (-1.56, -1.13)  | 1.38 (-1.01, 1.92)     | 0.028                     |
| <i>Cx3cl1</i>   | -1.19 (-1.80, 1.28)   | -1.63 (-2.25, -1.18)  | -2.18 (-3.09, -1.54)   | <b>0.007</b>              |
| <i>Cxcl1</i>    | 1.65 (1.07, 2.53)     | 1.28 (-1.41, 2.30)    | 2.67 (1.14, 6.21)      | -                         |
| <i>Cxcl10</i>   | -1.62 (-3.37, 1.29)   | 2.98 (-1.03, 9.08)    | 16.48 (9.26, 29.33)    | <b>0.006</b>              |
| <i>Cxcl11</i>   | 1.41 (-1.15, 2.30)    | 2.47 (-1.45, 8.85)    | 11.12 (6.00, 20.60)    | <b>0.029</b>              |
| <i>Cxcl12</i>   | 1.33 (1.05, 1.70)     | 1.13 (-1.10, 1.39)    | -1.89 (-2.64, -1.35)   | 0.008                     |
| <i>Cxcl13</i>   | -1.88 (-8.54, 2.42)   | -1.95 (-8.87, 2.33)   | 1.32 (-2.54, 4.40)     | -                         |
| <i>Cxcl15</i>   | 2.47 (1.12, 5.42)     | 1.52 (-1.15, 2.64)    | 1.85 (-1.03, 3.51)     | -                         |
| <i>Cxcl5</i>    | 71.53 (38.51, 132.87) | 61.60 (28.84, 131.58) | 32.69 (18.79, 56.88)   | -                         |
| <i>Cxcl9</i>    | -1.67 (-5.20, 1.87)   | 4.72 (1.16, 19.17)    | 37.33 (11.95, 116.65)  | <b>0.006</b>              |
| <i>Cxcr3</i>    | -1.86 (-2.69, -1.29)  | -1.49 (-3.03, 1.35)   | 2.63 (1.85, 3.73)      | <b>0.011</b>              |
| <i>Il16</i>     | 1.12 (-1.43, 1.79)    | -1.65 (-3.49, 1.28)   | -1.22 (-1.57, 1.06)    | 0.024                     |
| <i>Il18</i>     | -1.65 (-2.89, 1.06)   | -1.65 (-2.67, -1.02)  | 1.65 (1.08, 2.51)      | 0.011                     |
| <i>Il1a</i>     | -1.48 (-2.73, 1.25)   | 1.21 (-1.30, 1.91)    | -1.32 (-1.72, -1.02)   | 0.033                     |
| <i>Il8rb</i>    | 1.24 (-1.44, 2.22)    | 2.13 (1.50, 3.03)     | 1.07 (-1.49, 1.70)     | -                         |
| <i>Tnf</i>      | -2.01 (-2.72, -1.49)  | -1.21 (-2.00, 1.36)   | 2.15 (1.64, 2.80)      | <b>0.011</b>              |
| <i>Tnfrsf1a</i> | 1.15 (-1.14, 1.51)    | 1.06 (-1.20, 1.35)    | -1.51 (-1.72, -1.33)   | 0.007                     |

<sup>a</sup> Bold type indicates genes that differ significantly across the mycobacterial strains with a fold change >2 in at least one mycobacterial strain

<sup>b</sup> non-significant

<sup>c</sup> Genes with a fold change < 2 that differ significantly across the mycobacterial strains
