# Supplementary material
Source: PubMed Central journal article supplement (PMC3125856)
Supplement: supp_79_6_2372__2.pdf [file supp_79_6_2372__2.pdf]

**Supplemental Table 2.** Pulmonary gene induction in A/J mice six weeks after mycobacterial infection.

| Gene            | BCG Russia           | BCG Pasteur           | <i>M. tuberculosis</i> | Adjusted p-value         |
|-----------------|----------------------|-----------------------|------------------------|--------------------------|
| <i>Ccl1</i>     | 1.10 (-1.81, 2.20)   | 1.54 (-2.25, 5.37)    | 2.29 (-1.61, 8.45)     | - <sup>a</sup>           |
| <i>Ccl11</i>    | -1.44 (-2.09, 1.01)  | -2.14 (-3.23, -1.42)  | -1.96 (-4.03, 1.04)    | -                        |
| <i>Ccl12</i>    | 2.59 (1.51, 4.44)    | 2.26 (1.60, 3.21)     | 3.35 (2.43, 4.61)      | -                        |
| <i>Ccl17</i>    | -1.12 (-1.90, 1.53)  | 1.08 (-1.26, 1.46)    | 1.08 (-1.32, 1.54)     | -                        |
| <i>Ccl19</i>    | 1.38 (-1.20, 2.29)   | 1.08 (-1.39, 1.62)    | 1.95 (1.32, 2.88)      | -                        |
| <i>Ccl2</i>     | 2.40 (1.08, 5.34)    | 3.94 (1.52, 10.19)    | 6.31 (3.83, 10.39)     | -                        |
| <i>Ccl20</i>    | 1.37 (-1.45, 2.73)   | 2.59 (1.21, 5.55)     | 2.37 (1.17, 4.78)      | -                        |
| <i>Ccl4</i>     | 1.55 (-1.21, 2.89)   | 5.31 (2.30, 12.27)    | 5.05 (3.72, 6.85)      | -                        |
| <i>Ccl5</i>     | 1.37 (-1.14, 2.16)   | 2.57 (1.57, 4.20)     | 4.37 (2.91, 6.55)      | <b>0.048<sup>b</sup></b> |
| <i>Ccl7</i>     | 3.30 (2.12, 5.13)    | 3.74 (1.99, 7.03)     | 7.96 (3.83, 16.52)     | -                        |
| <i>Ccl8</i>     | 3.70 (1.60, 8.55)    | 3.80 (2.32, 6.23)     | 7.79 (4.38, 13.84)     | <b>0.040</b>             |
| <i>Ccl9</i>     | 1.19 (-1.90, 2.69)   | 1.06 (-1.80, 2.01)    | 1.27 (-1.02, 1.66)     | -                        |
| <i>Ccr1</i>     | 1.62 (-1.04, 2.73)   | 2.31 (1.61, 3.32)     | -1.03 (-1.32, 1.24)    | <b>0.037</b>             |
| <i>Ccr2</i>     | 1.20 (-1.35, 1.94)   | 2.99 (1.82, 4.91)     | -1.16 (-2.47, 1.84)    | <b>0.034</b>             |
| <i>Ccr4</i>     | 1.26 (-1.55, 2.47)   | 1.13 (-1.42, 1.83)    | 1.03 (-1.31, 1.40)     | -                        |
| <i>Ccr5</i>     | 1.25 (-1.36, 2.14)   | 3.45 (2.41, 4.96)     | 2.21 (1.43, 3.41)      | <b>0.040</b>             |
| <i>Ccr7</i>     | -1.60 (-2.21, -1.16) | -1.21 (-1.55, 1.06)   | -2.03 (-3.49, -1.18)   | -                        |
| <i>Ccr9</i>     | -2.03 (-3.18, -1.29) | 1.37 (1.13, 1.66)     | 1.15 (-1.16, 1.54)     | <b>0.034</b>             |
| <i>Cx3cl1</i>   | -1.64 (-2.24, -1.20) | -1.20 (-1.65, 1.14)   | -1.92 (-2.68, -1.37)   | -                        |
| <i>Cxcl1</i>    | 1.47 (-1.00, 2.16)   | 2.10 (1.28, 3.45)     | 1.59 (-1.22, 3.08)     | -                        |
| <i>Cxcl10</i>   | 2.11 (-1.20, 5.34)   | 6.47 (1.98, 21.20)    | 14.40 (8.65, 23.96)    | <b>0.040</b>             |
| <i>Cxcl11</i>   | 1.20 (-2.42, 3.47)   | 7.24 (2.22, 23.57)    | 10.15 (5.94, 17.34)    | -                        |
| <i>Cxcl12</i>   | -1.25 (-1.58, 1.01)  | -1.00 (-2.10, 2.09)   | -1.54 (-1.88, -1.26)   | -                        |
| <i>Cxcl13</i>   | 1.02 (-3.93, 4.09)   | -1.42 (-7.53, 3.72)   | 1.35 (-2.78, 5.08)     | -                        |
| <i>Cxcl15</i>   | 1.41 (-1.14, 2.28)   | 2.69 (1.62, 4.45)     | 1.08 (-1.80, 2.11)     | <b>0.034</b>             |
| <i>Cxcl5</i>    | 11.46 (2.97, 44.23)  | 72.71 (41.32, 127.94) | 8.96 (4.10, 19.62)     | <b>0.048</b>             |
| <i>Cxcl9</i>    | 4.56 (1.09, 19.04)   | 19.31 (4.93, 75.68)   | 42.74 (16.11, 113.40)  | <b>0.040</b>             |
| <i>Cxcr3</i>    | 1.19 (-1.15, 1.65)   | 2.07 (1.64, 2.60)     | 3.24 (2.60, 4.04)      | <b>0.008</b>             |
| <i>Il16</i>     | -1.25 (-2.10, 1.34)  | 1.77 (1.08, 2.91)     | -1.20 (-1.71, 1.19)    | 0.034 <sup>c</sup>       |
| <i>Il18</i>     | 1.53 (-1.09, 2.56)   | 1.14 (-1.59, 2.06)    | 1.27 (-1.22, 1.96)     | -                        |
| <i>Il1a</i>     | -1.08 (-1.74, 1.50)  | -1.75 (-2.73, -1.12)  | -1.83 (-2.36, -1.41)   | 0.034                    |
| <i>Il8rb</i>    | 1.05 (-1.35, 1.49)   | 1.40 (-1.34, 2.62)    | -1.38 (-2.26, 1.19)    | -                        |
| <i>Tnf</i>      | 1.19 (-1.48, 2.08)   | 1.93 (1.57, 2.38)     | 1.67 (1.27, 2.19)      | -                        |
| <i>Tnfrsf1a</i> | -1.18 (-1.50, 1.07)  | 1.13 (-1.13, 1.44)    | -1.41 (-1.73, -1.15)   | 0.008                    |

<sup>a</sup> non-significant

<sup>b</sup> Bold type indicates genes that differ significantly across the mycobacterial strains with a fold change >2 in at least one mycobacterial strain

<sup>c</sup> Genes with a fold change < 2 that differ significantly across the mycobacterial strains
