# Supplementary material
Source: PubMed Central journal article supplement (PMC3125856)
Supplement: supp_79_6_2372__3.pdf [file supp_79_6_2372__3.pdf]

**Supplemental Table 3.** Pulmonary gene induction in C57BL/6J mice three weeks after mycobacterial infection.

| Gene            | BCG Russia           | BCG Pasteur          | <i>M. tuberculosis</i> | Adjusted p-value          |
|-----------------|----------------------|----------------------|------------------------|---------------------------|
| <i>Ccl1</i>     | 1.44 (-1.51, 3.13)   | 6.72 (2.48, 18.18)   | 6.45 (2.74, 15.20)     | - <sup>a</sup>            |
| <i>Ccl11</i>    | -1.19 (-2.06, 1.45)  | 2.14 (1.51, 3.04)    | 1.73 (1.11, 2.70)      | <b>0.048</b> <sup>b</sup> |
| <i>Ccl12</i>    | 2.93 (-1.28, 11.02)  | 1.58 (-2.51, 6.29)   | 4.04 (1.89, 8.62)      | -                         |
| <i>Ccl17</i>    | 1.27 (-1.20, 1.92)   | 1.90 (1.28, 2.81)    | 1.78 (1.46, 2.16)      | -                         |
| <i>Ccl19</i>    | 1.41 (1.12, 1.79)    | 1.91 (1.46, 2.49)    | 2.16 (1.60, 2.91)      | <b>0.032</b>              |
| <i>Ccl2</i>     | 1.41 (-1.07, 2.12)   | 2.42 (1.87, 3.14)    | 2.38 (1.23, 4.63)      | -                         |
| <i>Ccl20</i>    | 2.10 (-1.05, 4.64)   | 1.06 (-1.62, 1.83)   | 3.86 (2.46, 6.05)      | <b>0.048</b>              |
| <i>Ccl4</i>     | 1.04 (-1.18, 1.27)   | 2.27 (1.81, 2.86)    | 1.88 (1.56, 2.28)      | <b>0.021</b>              |
| <i>Ccl5</i>     | 1.12 (-1.47, 1.84)   | 3.03 (2.16, 4.26)    | 3.15 (2.21, 4.49)      | <b>0.021</b>              |
| <i>Ccl7</i>     | 2.30 (1.33, 3.97)    | 3.19 (2.27, 4.48)    | 5.59 (3.22, 9.70)      | -                         |
| <i>Ccl8</i>     | 3.40 (1.27, 9.10)    | 2.89 (1.31, 6.38)    | 5.32 (2.35, 12.02)     | -                         |
| <i>Ccl9</i>     | -1.82 (-2.57, -1.29) | -1.65 (-3.71, 1.36)  | 1.03 (-1.21, 1.29)     | 0.027 <sup>c</sup>        |
| <i>Ccr1</i>     | 1.22 (-1.31, 1.95)   | -1.79 (-2.95, -1.09) | -1.57 (-2.74, 1.11)    | 0.048                     |
| <i>Ccr2</i>     | 1.21 (-1.05, 1.55)   | -1.50 (-2.30, 1.02)  | -1.82 (-2.57, -1.29)   | 0.009                     |
| <i>Ccr4</i>     | 1.66 (1.14, 2.42)    | 1.29 (1.09, 1.54)    | -1.39 (-1.73, -1.11)   | 0.021                     |
| <i>Ccr5</i>     | 1.25 (1.03, 1.52)    | 1.42 (1.07, 1.88)    | 1.75 (1.14, 2.68)      | -                         |
| <i>Ccr7</i>     | -1.11 (-1.81, 1.46)  | -1.09 (-1.78, 1.51)  | -1.55 (-1.88, -1.29)   | -                         |
| <i>Ccr9</i>     | 2.70 (1.89, 3.85)    | 1.24 (-1.11, 1.70)   | 1.72 (1.17, 2.54)      | <b>0.048</b>              |
| <i>Cx3cl1</i>   | -1.14 (-1.90, 1.48)  | 1.24 (-1.15, 1.78)   | -1.13 (-1.42, 1.11)    | -                         |
| <i>Cxcl1</i>    | 1.56 (1.04, 2.33)    | 1.46 (-1.03, 2.20)   | 1.47 (-1.10, 2.39)     | -                         |
| <i>Cxcl10</i>   | 1.83 (-1.06, 3.53)   | 9.52 (5.46, 16.58)   | 13.74 (8.31, 22.72)    | <b>0.021</b>              |
| <i>Cxcl11</i>   | 4.98 (1.75, 14.19)   | 16.72 (10.20, 27.40) | 14.29 (4.56, 44.79)    | -                         |
| <i>Cxcl12</i>   | 1.10 (-1.13, 1.36)   | 1.34 (1.04, 1.72)    | 1.03 (-1.33, 1.40)     | -                         |
| <i>Cxcl13</i>   | 2.73 (-1.30, 9.71)   | 1.19 (-1.46, 2.06)   | 2.54 (1.67, 3.87)      | -                         |
| <i>Cxcl15</i>   | 1.07 (-1.43, 1.65)   | -1.48 (-2.48, 1.13)  | -1.69 (-2.73, -1.05)   | 0.009                     |
| <i>Cxcl5</i>    | 7.08 (2.23, 22.44)   | 2.08 (-1.58, 6.87)   | 1.06 (-2.24, 2.53)     | <b>0.048</b>              |
| <i>Cxcl9</i>    | 3.69 (1.20, 11.36)   | 25.57 (9.93, 65.85)  | 25.99 (12.03, 56.16)   | -                         |
| <i>Cxcr3</i>    | 1.06 (-1.72, 1.91)   | 1.92 (1.31, 2.82)    | 2.18 (1.63, 2.93)      | -                         |
| <i>Il16</i>     | -1.42 (-1.86, -1.09) | 1.03 (-1.23, 1.31)   | -1.75 (-2.12, -1.45)   | 0.048                     |
| <i>Il18</i>     | 2.03 (1.32, 3.14)    | -1.19 (-2.11, 1.50)  | 1.04 (-1.21, 1.32)     | <b>0.039</b>              |
| <i>Il1a</i>     | -1.12 (-1.44, 1.15)  | -1.43 (-1.80, -1.14) | -1.04 (-1.47, 1.36)    | -                         |
| <i>Il8rb</i>    | -1.74 (-3.15, 1.04)  | -2.40 (-4.16, -1.39) | -3.63 (-8.35, -1.57)   | -                         |
| <i>Tnf</i>      | 1.23 (-1.36, 2.05)   | 1.72 (1.22, 2.41)    | 1.50 (-1.09, 2.46)     | -                         |
| <i>Tnfrsf1a</i> | 1.09 (-1.25, 1.47)   | 1.07 (-1.20, 1.37)   | -1.09 (-1.54, 1.29)    | -                         |

<sup>a</sup> non-significant

<sup>b</sup> Bold type indicates genes that differ significantly across the mycobacterial strains with a fold change >2 in at least one mycobacterial strain

<sup>c</sup> Genes with a fold change < 2 that differ significantly across the mycobacterial strains
