# Supplementary material
Source: PubMed Central journal article supplement (PMC3125856)
Supplement: supp_79_6_2372__4.pdf [file supp_79_6_2372__4.pdf]

**Supplemental Table 4.** Pulmonary gene induction in C57BL/6J mice six weeks after mycobacterial infection

| Gene            | BCG Russia           | BCG Pasteur          | <i>M. tuberculosis</i> | Adjusted p-value          |
|-----------------|----------------------|----------------------|------------------------|---------------------------|
| <i>Ccl1</i>     | 2.93 (1.01, 8.52)    | 5.02 (1.41, 17.85)   | 13.11 (5.01, 34.30)    | - <sup>a</sup>            |
| <i>Ccl11</i>    | 1.20 (-1.17, 1.68)   | -1.15 (-1.65, 1.26)  | -1.62 (-5.52, 2.10)    | -                         |
| <i>Ccl12</i>    | 3.23 (-1.02, 10.64)  | 3.07 (-1.01, 9.57)   | 2.86 (1.13, 7.23)      | -                         |
| <i>Ccl17</i>    | 1.76 (-1.07, 3.29)   | 1.02 (-2.08, 2.18)   | 1.28 (-2.07, 3.39)     | -                         |
| <i>Ccl19</i>    | 1.21 (-1.10, 1.62)   | 1.14 (-1.43, 1.85)   | 2.86 (1.79, 4.57)      | <b>0.018</b> <sup>b</sup> |
| <i>Ccl2</i>     | 3.08 (1.89, 5.01)    | 2.61 (1.61, 4.22)    | 3.23 (1.42, 7.37)      | -                         |
| <i>Ccl20</i>    | 2.92 (1.69, 5.04)    | 2.99 (1.88, 4.74)    | 8.20 (4.37, 15.38)     | -                         |
| <i>Ccl4</i>     | 1.21 (-1.20, 1.76)   | 1.41 (1.06, 1.88)    | 2.40 (1.36, 4.26)      | -                         |
| <i>Ccl5</i>     | 2.25 (1.59, 3.16)    | 2.08 (1.33, 3.25)    | 3.09 (2.07, 4.60)      | -                         |
| <i>Ccl7</i>     | 4.84 (3.08, 7.60)    | 5.30 (3.44, 8.14)    | 4.31 (1.85, 10.01)     | -                         |
| <i>Ccl8</i>     | 7.30 (3.43, 15.56)   | 8.19 (3.63, 18.50)   | 5.31 (1.47, 19.11)     | -                         |
| <i>Ccl9</i>     | -1.59 (-2.22, -1.14) | -1.74 (-2.66, -1.14) | 1.00 (-1.18, 1.18)     | -                         |
| <i>Ccr1</i>     | -2.01 (-3.26, -1.23) | 1.13 (-1.40, 1.78)   | -2.07 (-5.13, 1.20)    | <b>0.007</b>              |
| <i>Ccr2</i>     | -1.68 (-2.31, -1.23) | 1.44 (1.07, 1.93)    | -2.59 (-10.64, 1.59)   | <b>0.024</b>              |
| <i>Ccr4</i>     | 1.11 (-1.12, 1.38)   | 1.14 (-1.17, 1.51)   | -1.08 (-1.40, 1.19)    | -                         |
| <i>Ccr5</i>     | 1.31 (-1.05, 1.79)   | 1.97 (1.23, 3.15)    | -1.02 (-5.08, 4.85)    | -                         |
| <i>Ccr7</i>     | -1.57 (-2.50, 1.01)  | -1.01 (-1.82, 1.78)  | -1.77 (-3.97, 1.27)    | -                         |
| <i>Ccr9</i>     | 1.08 (-1.36, 1.58)   | 1.98 (1.37, 2.86)    | 1.01 (-3.91, 3.96)     | -                         |
| <i>Cx3cl1</i>   | -1.04 (-1.52, 1.40)  | -1.10 (-1.53, 1.25)  | -1.03 (-1.75, 1.66)    | -                         |
| <i>Cxcl1</i>    | 1.58 (1.30, 1.93)    | 2.62 (1.58, 4.35)    | -1.40 (-4.82, 2.46)    | -                         |
| <i>Cxcl10</i>   | 5.91 (2.58, 13.51)   | 7.14 (3.50, 14.58)   | 9.69 (5.74, 16.36)     | -                         |
| <i>Cxcl11</i>   | 8.99 (3.90, 20.69)   | 7.45 (2.20, 25.23)   | 5.97 (1.99, 17.88)     | -                         |
| <i>Cxcl12</i>   | 1.12 (-1.13, 1.42)   | 1.25 (-1.06, 1.65)   | 1.20 (-1.56, 2.24)     | -                         |
| <i>Cxcl13</i>   | 2.14 (1.49, 3.08)    | 2.85 (1.59, 5.11)    | 7.22 (2.47, 21.07)     | -                         |
| <i>Cxcl15</i>   | -1.04 (-1.57, 1.47)  | 1.21 (-1.29, 1.89)   | -2.93 (-12.99, 1.52)   | -                         |
| <i>Cxcl5</i>    | 4.83 (1.51, 15.43)   | 11.71 (4.97, 27.57)  | -1.64 (-5.94, 2.22)    | -                         |
| <i>Cxcl9</i>    | 19.24 (7.14, 51.80)  | 30.82 (10.11, 94.00) | 16.42 (4.42, 61.01)    | -                         |
| <i>Cxcr3</i>    | 1.45 (-1.15, 2.42)   | 2.12 (1.38, 3.26)    | 2.63 (1.88, 3.68)      | -                         |
| <i>Il16</i>     | -1.28 (-1.69, 1.03)  | -1.35 (-1.87, 1.03)  | -1.65 (-3.12, 1.14)    | -                         |
| <i>Il18</i>     | 1.26 (-1.11, 1.75)   | 1.90 (1.06, 3.40)    | -1.05 (-1.43, 1.29)    | -                         |
| <i>Il1a</i>     | -1.10 (-1.39, 1.14)  | -1.48 (-2.29, 1.04)  | -1.44 (-4.23, 2.04)    | -                         |
| <i>Il8rb</i>    | -5.03 (-8.87, -2.86) | -2.50 (-5.29, -1.18) | -6.48 (-14.76, -2.84)  | -                         |
| <i>Tnf</i>      | 1.07 (-1.54, 1.75)   | 1.22 (-1.70, 2.52)   | 2.49 (1.37, 4.55)      | -                         |
| <i>Tnfrsf1a</i> | -1.07 (-1.44, 1.27)  | 1.03 (-1.25, 1.33)   | -1.40 (-2.47, 1.25)    | -                         |

<sup>a</sup> non-significant

<sup>b</sup> Bold type indicates genes that differ significantly across the mycobacterial strains with a fold change >2 in at least one mycobacterial strain
